# Supplementary material for: A B-doped layered VOPO4·2H2O cathode for high-performance zinc-ion batteries with an H+/Zn2+ co-insertion mechanism
Source: Royal Society of Chemistry journal article supplement (doi:10.1039/d3qi02400h), 2023-12-14
Supplement: d3qi02400h1.pdf [file d3qi02400h1.pdf]

## Supporting Information

### **B-doped Layered VOPO<sub>4</sub>·2H<sub>2</sub>O Cathode for High-performance Zinc-Ion Batteries with H<sup>+</sup>/Zn<sup>2+</sup> Co-insertion Mechanism**

Jingjing Yuan,<sup>\*a</sup> Yifan Qiao,<sup>a</sup> Yifan Li,<sup>a</sup> Yuchen Lu,<sup>a</sup> Junjie He,<sup>a</sup> Yongqi Ge,<sup>b</sup>  
Guangyu He,<sup>a</sup> Haiqun Chen<sup>\*a</sup>

(<sup>a</sup> Key Laboratory of Advanced Catalytic Materials and Technology, Advanced Catalysis and Green Manufacturing Collaborative Innovation Center, Changzhou University, Changzhou, Jiangsu Province 213164, China

<sup>b</sup> Changzhou Qishuyan Locomotive and Rolling Stock Parts Industry Co., Ltd, Changzhou, Jiangsu Province 213164, China)

\*Corresponding email: yuanjj@cczu.edu.cn (Jingjing Yuan)

### **Experiments Section**

#### **1. Preparation of B-doped VOPO<sub>4</sub>·2H<sub>2</sub>O material**

In a typical synthesis, 4.8 g of V<sub>2</sub>O<sub>5</sub>, 26.6 mL of H<sub>3</sub>PO<sub>4</sub> and 115.4 mL deionized water were added to a three-neck flask, respectively. Then 10 mL of HNO<sub>3</sub> was added with magnetic stirring for 30 min to stabilize the oxidation state of vanadium. The mixture was then heated at 110 °C for 16 h. The yellow precipitate was collected by centrifugation from the bottom after cooling to the room temperature, and washed three times with deionized water and acetone, respectively. The resulting bright yellow VOPO<sub>4</sub>·2H<sub>2</sub>O samples were dried in a vacuum oven at 60 °C.

Then 0.5 g of synthesized VOPO<sub>4</sub>·2H<sub>2</sub>O was taken, 0.5 g of boric acid was added and dispersed in 50 mL of N-methyl pyrrolidone. After VOPO<sub>4</sub>·2H<sub>2</sub>O and boric acid

were mixed evenly, the mixture was transferred into a 100 mL of Teflon-lined stainless-steel autoclave and kept at 120 °C for 2 h. After cooling down, the product was also washed with ultra-pure water and collected by centrifugation, named B-doped  $\text{VOPO}_4 \cdot 2\text{H}_2\text{O}$ .

## **2. Characterization**

The crystalline phase of B-doped  $\text{VOPO}_4 \cdot 2\text{H}_2\text{O}$  and  $\text{VOPO}_4 \cdot 2\text{H}_2\text{O}$  were investigated by powder X-ray diffraction (XRD) with Bruker D8 Advance diffractometer (Cu K $\alpha$  radiation,  $\lambda = 0.15418 \text{ \AA}$ ) over the range 10-50° at a scan rate of 10°·min<sup>-1</sup>. Fourier transform infrared (FT-IR) spectra were collected on a Nicolet Avatar 370 spectrometer with KBr tablets. The chemical states of each element in the prepared samples were analyzed by X-ray photoelectron spectroscopy (XPS) on EscaLab 250 (USA) using a monochromatic Al-K source. The weight change of the samples was investigated by a differential thermal thermogravimetry analyzer (DSC-TG, STA 449 F5). The high-angle annular dark-field (HAADF) and its super-X EDS were carried out with FEI Talos F200X G2. The morphology and microstructure of B-doped  $\text{VOPO}_4 \cdot 2\text{H}_2\text{O}$  were observed by high-resolution transmission electron microscopy (HRTEM, JEM-2100F) and field-emission scanning electron microscopy (FESEM, JEOL JSM-6700F).

## **3. Electrochemical measurements**

The cathode material was prepared by mixing the active materials, acetylene black and polyvinylidene fluoride (PVDF) in N-methyl pyrrolidone (NMP) solutions in mass ratio of 7:2:1. The smooth ink was evenly coated on the stainless-steel net, and dried in

a vacuum oven at 60 °C for 12 h. The anode material was commercial zinc foil, and the electrolyte was 3 mol L<sup>-1</sup> of Zn(CF<sub>3</sub>SO<sub>3</sub>)<sub>2</sub> aqueous solution. The electrochemical performance of B-doped VOPO<sub>4</sub>·2H<sub>2</sub>O and VOPO<sub>4</sub>·2H<sub>2</sub>O electrode materials were evaluated by cyclic voltammetry (CV) performed on the CHI 760E electrochemical workstation (Shanghai Chenhua Instrument Co., Ltd.). A series of 100 mA g<sup>-1</sup> constant-current pulses were used in constant-current batch titration (GITT) that allowed to rest for 0.5 h. The galvanostatic charge-discharge (GCD) tests were completed on the Neware electrochemical workstation, the voltage window of GCD is between 0.2 and 1.9 V, and the current density was set in the range of 0.1~1 A g<sup>-1</sup>.

The capacity recorded by the Neware software is calculated according to equation of “ $C=I\times\Delta t/m$ ” (S1), in which  $I$ ,  $\Delta t$ , and  $m$  are the current (mA), the discharge time (h), and the mass of active material (g), respectively. The energy density (E) and power density (P) of AZIBs were separately evaluated by the equations of “ $E=C\times V/m$ ” (S2) and “ $P=3600E/t$ ” (S3), in which  $C$ ,  $V$ ,  $m$ ,  $t$  is the capacitance, average discharge voltage, mass and discharge time, respectively.

## Results Section

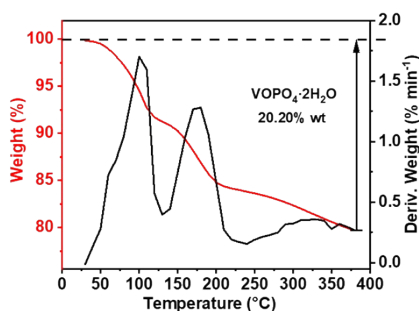

Figure S1 DSC-TG curves of VOPO<sub>4</sub>·2H<sub>2</sub>O.

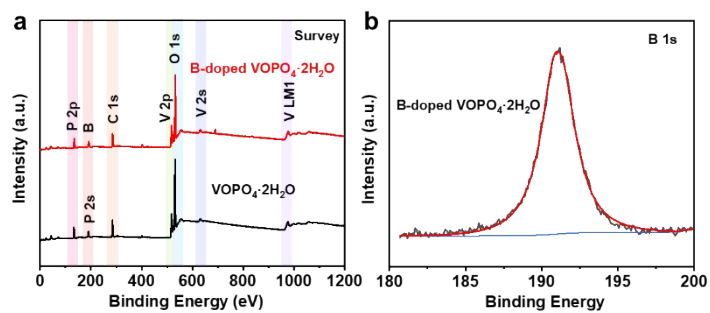

**Figure S2** (a) Survey XPS spectra of B-doped  $\text{VOPO}_4 \cdot 2\text{H}_2\text{O}$  and  $\text{VOPO}_4 \cdot 2\text{H}_2\text{O}$ , (b) High-resolution XPS spectra of B in B-doped  $\text{VOPO}_4 \cdot 2\text{H}_2\text{O}$ .

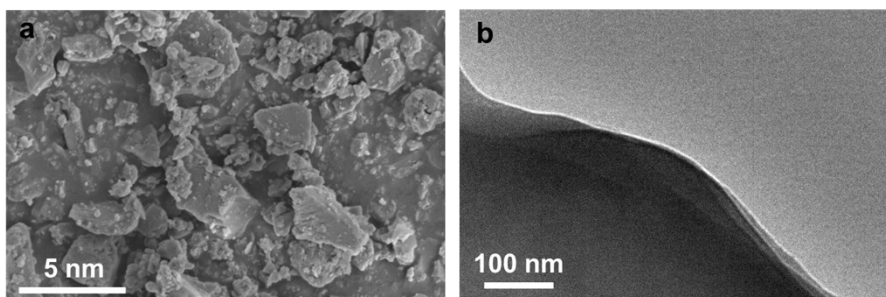

**Figure S3** (a) FESEM and (b) HRTEM images of  $\text{VOPO}_4 \cdot 2\text{H}_2\text{O}$ .

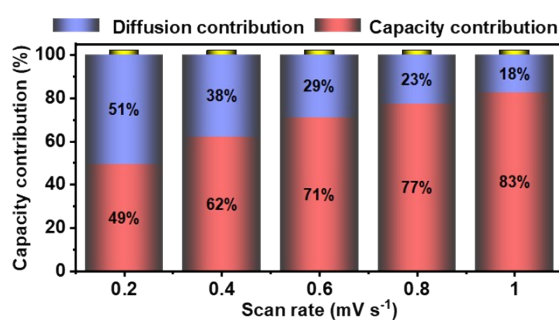

**Figure S4** Contribution ratio of capacitance at various scan rates in  $\text{VOPO}_4 \cdot 2\text{H}_2\text{O}$ .

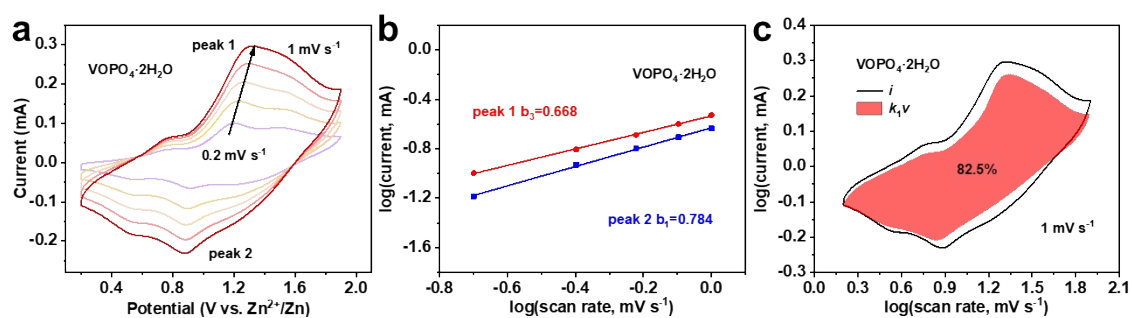

**Figure S5** (a) CV curves of VOPO<sub>4</sub>·2H<sub>2</sub>O at different scanning speeds, (b) Relationship between scan rates and peak currents, (c) CV fitting of pseudo-capacitance.

**Table S1** Comparison of electrochemical performance of VOPO<sub>4</sub>-based cathodes.

| Materials                                                      | Current density (A g <sup>-1</sup> ) | Capacity (mAh g <sup>-1</sup> ) | Reference                                                      |
|----------------------------------------------------------------|--------------------------------------|---------------------------------|----------------------------------------------------------------|
| VOPO <sub>4</sub> /C                                           | 0.1                                  | 140                             | <i>ACS Appl. Mater. Interfaces</i> , 2022, 14(40): 45494-45502 |
| NaVOPO <sub>4</sub> ·0.83H <sub>2</sub> O                      | 0.1                                  | 187                             | <i>Small</i> , 2023, 19: 2303227                               |
| Na <sub>x</sub> VOPO <sub>4</sub> ·nH <sub>2</sub> O           | 0.3                                  | 100                             | <i>Energy Fuels</i> , 2022, 36(12): 6520-6531                  |
| PPy-VOPO <sub>4</sub>                                          | 0.1                                  | 65                              | <i>ACS Appl. Energy Mater.</i> , 2019, 2(12): 8667-8674        |
| Li <sub>3</sub> V <sub>2</sub> (PO <sub>4</sub> ) <sub>3</sub> | 0.3                                  | 128                             | <i>Chem Comm.</i> , 2021, 57: 6253-6256                        |
| δ-VOPO <sub>4</sub>                                            | 0.3                                  | 122.6                           | <i>Chem. Sci.</i> , 2023, 14: 8206-8213                        |
| <b>B-doped VOPO<sub>4</sub></b>                                | <b>0.1</b>                           | <b>234.5</b>                    | <b>This work</b>                                               |
